# Supplementary material for: SARS-CoV-2 Seroprevalence and Symptom Onset in Culturally Linked Orthodox Jewish Communities Across Multiple Regions in the United States
Source: PubMed Central journal article supplement (PMC7948060; doi:10.1001/jamanetworkopen.2021.2816), 2021-03-10
Supplement: jamanetwopen-e212816-s001.pdf [file jamanetwopen-e212816-s001.pdf]

## Supplemental Online Content

Zyskind I, Rosenberg AZ, Zimmerman J, et al. SARS-CoV-2 seroprevalence and symptom onset in culturally linked Orthodox Jewish communities across multiple regions in the United States. *JAMA Netw Open*. 2021;4(3):e212816. doi:10.1001/jamanetworkopen.2021.2816

### **eAppendix.** SARS-CoV-2 Survey

This supplemental material has been provided by the authors to give readers additional information about their work.

**eAppendix. SARS-CoV-2 Survey**

What is your date of birth?

\_\_\_\_\_

What is your gender?

- Male  
 Female

In what ZIP code is your home located?

\_\_\_\_\_

Did you ever have any symptoms or suspicion of having coronavirus?

- Yes  
 No

When did your symptoms for Coronavirus begin?

Notes for reference:

Purim was March 10th

Pesach was April 9<sup>th</sup>

\_\_\_\_\_

Did you ever test positive for Coronavirus by nasal swab?

- Yes    No

How many people live in the same house as you?

\_\_\_\_\_

Did any of the people you live with in your house have symptoms or were positive for COVID-19?

- Yes     No
